# Supplementary material for: Assessing Cold Plasma’s Impact on Banana Growth and Fusarium Wilt Control
Source: PubMed Central journal article supplement — Plant Pathol J. 2024 Sep 1;40(5):463–74. doi: 10.5423/PPJ.OA.05.2024.0083 (PMC11471925; doi:10.5423/ppj.oa.05.2024.0083), 2024-09-01
Supplement: PPJ-OA-05-2024-0083-Supplementary-Table-1,2.pdf [file PPJ-OA-05-2024-0083-Supplementary-Table-1%2C2.pdf]

**Supplementary Table 1.** *Foc* TR4 specific primers

| Primer | Sequence                             | Annealing temperature (°C) | Reference          |
|--------|--------------------------------------|----------------------------|--------------------|
| TR4_F  | 5'-CAC GTT TAA GGT GCC ATG AGA G-3'  | 60                         | Dita et al. (2010) |
| TR4_R  | 5'-CGC ACG CCA GGA CTG CCT CGT GA-3' | 60                         | Dita et al. (2010) |

*Foc*, *Fusarium oxysporum* f. sp. *ubense*.

**Supplementary Table 2.** List of primers

| Primer                    | Primer sequences          | T <sub>m</sub> (°C) | Product size (bp) |
|---------------------------|---------------------------|---------------------|-------------------|
| <i>RPS2</i> _F            | CGGGATTGCCTGATATTGTG      | 53.4                | 200               |
| <i>RPS2</i> _R            | CCCTCACAAATTGCGGATAC      | 53.9                |                   |
| <i>PRI</i> _F             | ACCAAACAGCGCATCGG         | 56.4                | 110               |
| <i>PRI</i> _R             | CTTTTGACGGCGTCGATT        | 53.4                |                   |
| <i>WRKY22</i> _F          | GACCCACGATGCTCATT         | 55.0                | 104               |
| <i>WRKY22</i> _R          | TGGGCTTGCTAATGATGAAA      | 52.2                |                   |
| <i>WRKY50</i> _F          | ATGCAGGATCGGGTTCAGAA      | 56.4                | 101               |
| <i>WRKY50</i> _R          | GATTGGGGCTGTTCTTACC       | 56.2                |                   |
| <i>PAL</i> _F             | TGAGCCGTTGACGAAGCCGAA     | 61.6                | 117               |
| <i>PAL</i> _R             | TTTGATTCCCGCTCGATCG       | 55.5                |                   |
| <i>CEBiP</i> _F           | ACACCAGCCTCCCTAGCAGTAT    | 59.8                | 102               |
| <i>CEBiP</i> _R           | GACACTACAACCAGCACTAG      | 55.5                |                   |
| <i>ChiH</i> _F            | TGTACATCGCGGACACCAC       | 60.5                | 129               |
| <i>ChiH</i> _R            | TTCGTACCCGCTCGACATCA      | 58.4                |                   |
| <i>Cytochrome P450</i> _F | TCAATGATTCTATTCTGCTTGATAA | 50.4                | 120               |
| <i>Cytochrome P450</i> _R | CATGAAACATCAGGCCCA        | 52.7                |                   |
| <i>NAC68</i> _F           | TTGCTGCCAGACTTCGATGA      | 56.7                | 126               |
| <i>NAC68</i> _R           | GAACCACTCATCTTCTTCTC      | 52.6                |                   |
| <i>CAT</i> _F             | CCCCATTCCAAATCGTATCG      | 54.6                | 165               |
| <i>CAT</i> _R             | CTCCGGGTTGCTTGAAATCG      | 57.8                |                   |
