# Supplementary material for: Assessing Cold Plasma’s Impact on Banana Growth and Fusarium Wilt Control
Source: PubMed Central journal article supplement — Plant Pathol J. 2024 Sep 1;40(5):463–74. doi: 10.5423/PPJ.OA.05.2024.0083 (PMC11471925; doi:10.5423/ppj.oa.05.2024.0083), 2024-09-01
Supplement: PPJ-OA-05-2024-0083-Supplementary-Table-3.pdf [file PPJ-OA-05-2024-0083-Supplementary-Table-3.pdf]

**Supplementary Table 3.** Relative expression value of *PRI*, *WRKY22*, *WRKY50*, *PAL*, *CEBiP*, *ChiH*, *Cytochrome P450*, *NAC68*, and *CAT* genes at 2, 24, 48 and 72 hpi in groups 1, 2 and 3 determined using RT-qPCR

| Gene                   | Hours post-inoculation (hpi) | Treated (plasma) + <i>Foc</i> inoculated (group 1) | Untreated (non-plasma) + <i>Foc</i> inoculated (group 2) | Treated (plasma) + non- <i>Foc</i> inoculated (group 3) |
|------------------------|------------------------------|----------------------------------------------------|----------------------------------------------------------|---------------------------------------------------------|
| <i>PRI</i>             | 2                            | 3.712 ± 0.066                                      | 0.411 ± 0.093                                            | 0.000 ± 0.035                                           |
|                        | 24                           | 22.486 ± 0.074                                     | 9.504 ± 0.093                                            | 3.170 ± 0.028                                           |
|                        | 48                           | 5.244 ± 0.045                                      | 7.926 ± 0.123                                            | 0.355 ± 0.051                                           |
|                        | 72                           | 63.460 ± 0.098                                     | 2.111 ± 0.186                                            | 0.782 ± 0.105                                           |
| <i>WRKY22</i>          | 2                            | 1.546 ± 0.122                                      | 0.298 ± 0.084                                            | 2.027 ± 0.033                                           |
|                        | 24                           | 14.743 ± 0.033                                     | 4.979 ± 0.277                                            | 3.077 ± 0.037                                           |
|                        | 48                           | 4.227 ± 0.038                                      | 5.683 ± 0.074                                            | 0.384 ± 0.111                                           |
|                        | 72                           | 17.794 ± 0.045                                     | 5.179 ± 0.104                                            | 0.673 ± 0.073                                           |
| <i>WRKY50</i>          | 2                            | 1.440 ± 0.062                                      | 0.304 ± 0.064                                            | 0.594 ± 0.130                                           |
|                        | 24                           | 0.280 ± 0.269                                      | 0.656 ± 0.213                                            | 2.545 ± 0.028                                           |
|                        | 48                           | 1.563 ± 0.026                                      | 1.702 ± 0.030                                            | 0.514 ± 0.105                                           |
|                        | 72                           | 3.840 ± 0.059                                      | 4.455 ± 0.075                                            | 0.436 ± 0.039                                           |
| <i>PAL</i>             | 2                            | 1.944 ± 0.087                                      | 0.394 ± 0.087                                            | 2.900 ± 0.007                                           |
|                        | 24                           | 12.852 ± 0.059                                     | 1.058 ± 0.270                                            | 9.561 ± 0.075                                           |
|                        | 48                           | 0.793 ± 0.193                                      | 13.426 ± 0.053                                           | 0.138 ± 0.351                                           |
|                        | 72                           | 1.968 ± 0.345                                      | 2.256 ± 0.201                                            | 0.661 ± 0.044                                           |
| <i>CEBiP</i>           | 2                            | 3.452 ± 0.186                                      | 0.394 ± 0.072                                            | 0.132 ± 0.117                                           |
|                        | 24                           | 0.195 ± 0.101                                      | 0.313 ± 0.015                                            | 0.386 ± 0.109                                           |
|                        | 48                           | 0.848 ± 0.074                                      | 0.117 ± 0.063                                            | 0.232 ± 0.143                                           |
|                        | 72                           | 0.406 ± 0.117                                      | 4.104 ± 0.092                                            | 0.077 ± 0.105                                           |
| <i>ChiH</i>            | 2                            | 0.127 ± 0.257                                      | 0.009 ± 0.700                                            | 0.107 ± 0.087                                           |
|                        | 24                           | 0.107 ± 0.112                                      | 0.040 ± 0.518                                            | 0.123 ± 0.057                                           |
|                        | 48                           | 0.082 ± 0.265                                      | 0.148 ± 0.156                                            | 0.043 ± 0.311                                           |
|                        | 72                           | 0.069 ± 0.200                                      | 34.791 ± 0.725                                           | 0.156 ± 0.064                                           |
| <i>Cytochrome P450</i> | 2                            | 1.588 ± 0.178                                      | 1.589 ± 0.095                                            | 0.944 ± 0.072                                           |
|                        | 24                           | 4.749 ± 0.183                                      | 1.218 ± 0.129                                            | 2.088 ± 0.172                                           |
|                        | 48                           | 5.064 ± 0.164                                      | 1.248 ± 0.253                                            | 1.059 ± 0.119                                           |
|                        | 72                           | 3.774 ± 0.204                                      | 0.567 ± 0.292                                            | 0.378 ± 0.104                                           |
| <i>NAC68</i>           | 2                            | 0.850 ± 0.073                                      | 0.733 ± 0.108                                            | 3.256 ± 0.133                                           |
|                        | 24                           | 2.414 ± 0.035                                      | 1.710 ± 0.150                                            | 0.299 ± 0.101                                           |
|                        | 48                           | 1.482 ± 0.081                                      | 1.526 ± 0.115                                            | 0.216 ± 0.108                                           |
|                        | 72                           | 7.420 ± 0.080                                      | 0.186 ± 0.084                                            | 0.166 ± 0.389                                           |
| <i>CAT</i>             | 2                            | 1.130 ± 0.016                                      | 2.169 ± 0.094                                            | 1.313 ± 0.045                                           |
|                        | 24                           | 14.668 ± 0.112                                     | 7.508 ± 0.102                                            | 3.366 ± 0.060                                           |
|                        | 48                           | 23.364 ± 0.157                                     | 11.173 ± 0.206                                           | 13.091 ± 0.055                                          |
|                        | 72                           | 28.649 ± 0.229                                     | 0.097 ± 0.156                                            | 0.435 ± 0.271                                           |

All data were subjected to two-way ANOVA. The data shown are expressed as the mean (%) of three technical replicates from the pool of three biological replicates ± standard error.

RT-qPCR, real time - quantitative polymerase chain reaction; *Foc*, *Fusarium oxysporum* f. sp. *cubense*.
